# Supplementary material for: Bap-Independent Biofilm Formation in Staphylococcus xylosus
Source: MDPI journal article supplement (doi:10.3390/microorganisms9122610), 2021-12-17
Supplement: s1 [file s1]

Table S1: Identified peptide sequences (intensity values) mapping on Bap in wildtype and mutant strains of TWW strains 2.1023 and 2.1523

| identified peptide sequences mapping on Bap | start | end  | WT_.023<br>Intensity | Mut_.023<br>Intensity | WT_.523<br>Intensity | Mut_.523<br>Intensity |
|---------------------------------------------|-------|------|----------------------|-----------------------|----------------------|-----------------------|
| AATDDNDKTEEAESQLELATSK                      | 254   | 277  | 437230000            |                       | 825520000            |                       |
| AEPNSSVTVGFPGGGK                            | 970   | 985  |                      |                       | 32081000             |                       |
| AMATPTALAAAADQSEEVEK                        | 347   | 366  | 208800000            |                       | 327180000            |                       |
| ASLIELVNDQESAK                              | 322   | 335  |                      |                       | 629790000            |                       |
| DAEYDDQGNLIR                                | 686   | 697  | 168230000            |                       | 437700000            |                       |
| DEETTSESLQPSSEEDNTK                         | 231   | 249  |                      |                       | 11131000             |                       |
| DKGEALDVSDIK                                | 58    | 69   | 442310000            |                       | 834900000            |                       |
| DLLPYIESVELHK                               | 604   | 616  |                      |                       | 39975000             |                       |
| DLLPYIESVELHKYDYQGLSGFDK                    | 604   | 627  |                      |                       | 51671000             |                       |
| ESDDTNKEDLMSPSDK                            | 137   | 152  | 51506000             |                       | 95708000             |                       |
| GLLINNTLTSTLALQDYDKDGLLDR                   | 717   | 742  |                      |                       | 390300000            |                       |
| GLLINNTLTSTLALQDYDKDGLLDYER                 | 717   | 745  | 592080000            |                       | 655690000            |                       |
| IELDDTVANILNAGSLENNK                        | 486   | 506  | 51193000             |                       | 146510000            |                       |
| IELDDTVANILNAGSLENNKLNQMFVR                 | 486   | 514  | 177740000            |                       | 218030000            |                       |
| LDLILAEHVTK                                 | 420   | 430  | 280790000            |                       | 363530000            |                       |
| LIEFNLLPETIGVR                              | 656   | 670  | 310470000            |                       |                      |                       |
| LNQSVNNILTK                                 | 675   | 685  | 137520000            | 75044000              | 269420000            |                       |
| LTNTWEVNFIR                                 | 454   | 464  | 196220000            |                       | 340010000            |                       |
| NETPSTEDKETTNSSEVLNENTDSEK                  | 180   | 205  |                      |                       | 51684000             |                       |
| NGVFSYSK                                    | 582   | 589  | 76472000             |                       | 112630000            |                       |
| QKEDFTFAGYLTDK                              | 702   | 716  | 171600000            |                       | 181760000            |                       |
| QVSLSDPENNDTDGDGKNDGDEVINYK                 | 746   | 772  | 242550000            |                       | 377590000            |                       |
| SDEPKDEETTSESLQPSSEEDNTK                    | 226   | 249  | 97864000             |                       | 173990000            |                       |
| SDEPKDEETTSESLQPSSEEDNTKETEK                | 226   | 253  | 242560000            |                       | 265260000            |                       |
| SFLSDQLPEK                                  | 285   | 294  | 211740000            |                       |                      |                       |
| SNQWSYNQCIDK                                | 592   | 603  |                      |                       | 31703000             |                       |
| SNQWSYNQCIDKDLLPYIESVELHK                   | 592   | 616  |                      |                       | 58891000             |                       |
| SNQWSYNQCIDKDLLPYIESVELHKYDYQGLSGFDK        | 592   | 627  | 119000000            |                       | 212380000            |                       |
| SQPVEFVR                                    | 439   | 446  | 174800000            |                       |                      |                       |
| SVEDSNADETNNNAK                             | 70    | 84   | 219120000            |                       | 318450000            |                       |
| TLATPTR                                     | 336   | 342  | 12563000             |                       | 26559000             |                       |
| TSPLVGKPEAADITNEDTVVNGSVPLK                 | 773   | 799  | 46138000             |                       | 190040000            |                       |
| TSPLVGKPEAADITNEDTVVNGSVPLKEGAASQAAK        | 773   | 808  |                      |                       | 596210000            |                       |
| TSPLVGKPEAADITNEDTVVNGSVPLKEGAASQTAK        | 773   | 808  | 392440000            |                       |                      |                       |
| TTAEDNSQKDNTQEDTATQK                        | 206   | 225  | 394100000            |                       | 544760000            |                       |
| VADLTLDIGNGSITSNLDNK                        | 635   | 655  | 110330000            |                       | 213300000            |                       |
| VEDSNSSNVVENNR                              | 2097  | 2111 | 36659000             |                       | 28438000             |                       |
| YDYQGLSGFDK                                 | 617   | 627  | 96400000             |                       | 180680000            |                       |

## **Supplementary figures**

**A**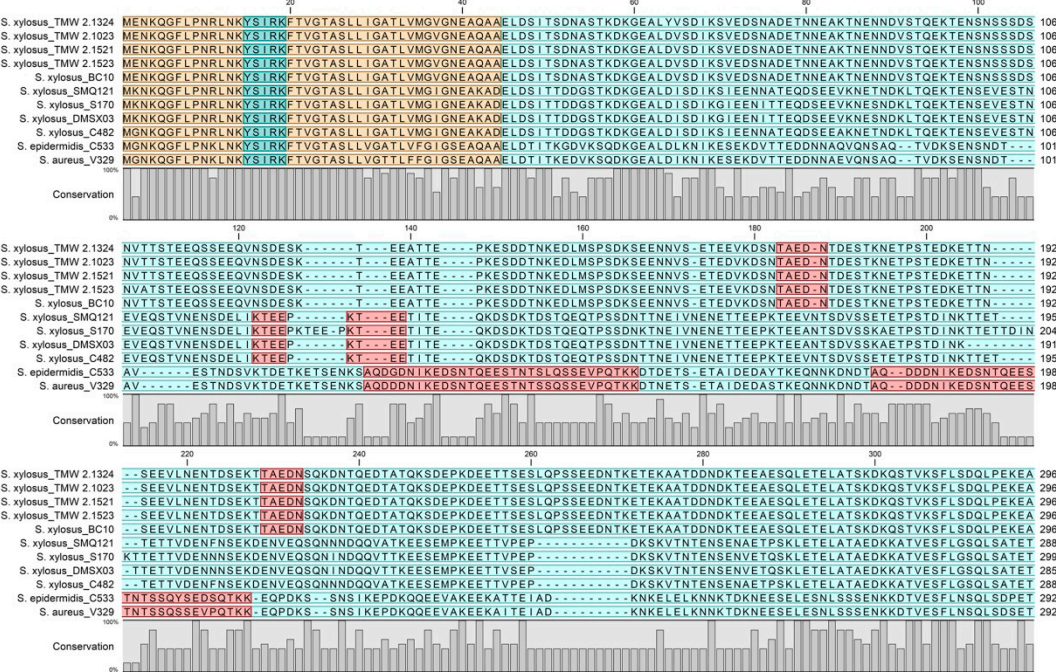**B**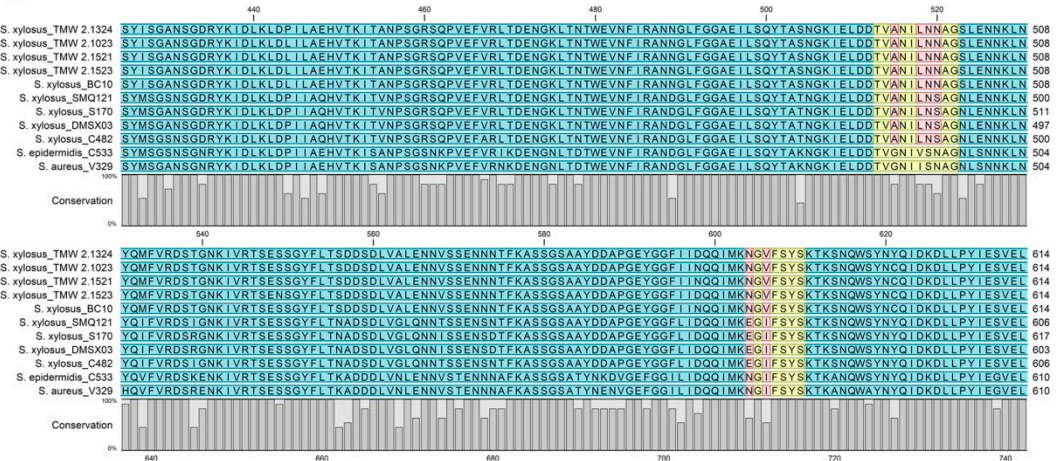**C**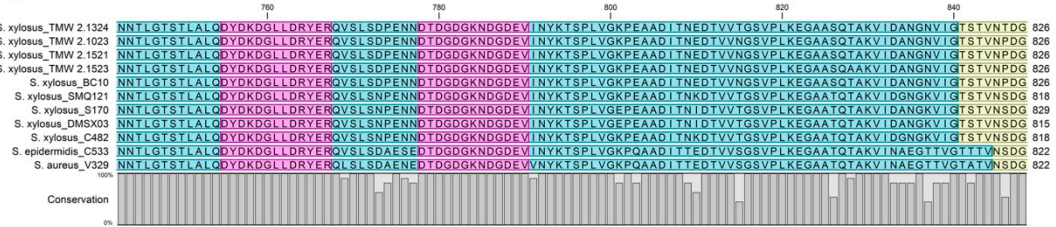**D**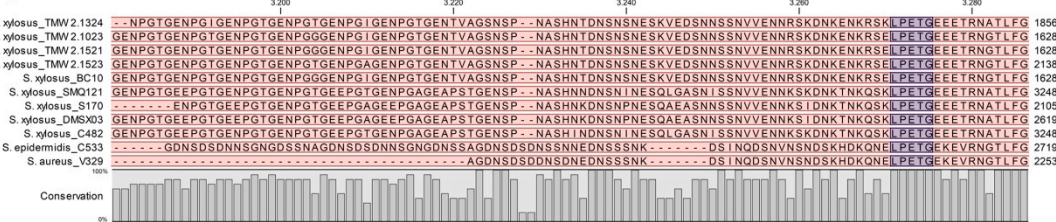

**Figure S1:** Bap sequence alignment of selected *S. xyloso* strains with two Bap-dependent biofilm formers: *S. epidermidis* C533 and *S. aureus* V329. Only functionally important parts of the alignment are shown. A. shows the YSIRK-Signal peptide sequence as well the difference in A-region repeat length between *S. epidermidis*/*S. aureus* and *S. xyloso*. B. shows the sequence differences between the two amyloidprone peptides (defined by Taglialegna et al., [8]) of Bap Region B (marked in yellow). C. displays the conservation across species of EF hand domains 2 and 3 (pink). D. shows the differences in D-repeats between the species. While *S. aureus* and *S. epidermidis* region D is rich in SD repeats, *S. xyloso* encodes G-rich repeats.

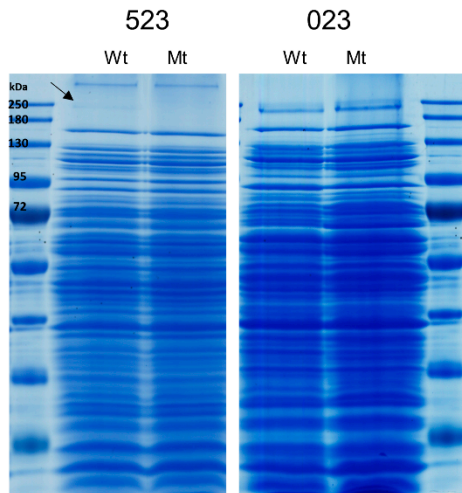

**Figure S2:** Analysis of cell extract protein preparations on SDS-PAGE. Left: TMW 2.1523 wildtype (Wt) and mutant (Mt) strain, Right: TMW 2.1023 Wt and Mt. The black arrow indicates a possible location of Bap in TMW 2.1523 - Wt.

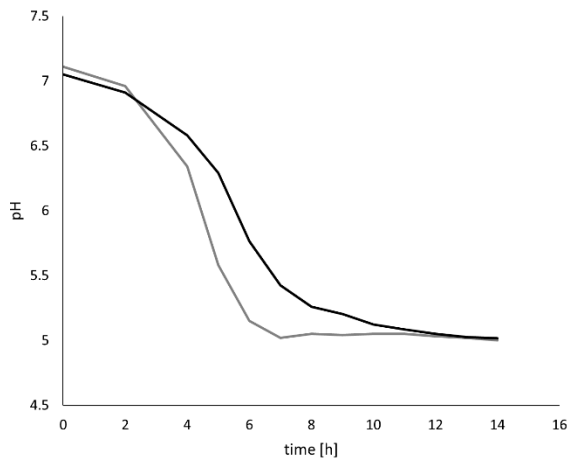

**Figure S3:** pH changes of *S. xyloso* TMW 2.1023 (grey) and 2.1523 (black) incubated in TSB<sup>+</sup> aerobically at 37 °C. Changes in pH were recorded over 12 hours, OD<sub>600</sub> at t<sub>0</sub> was set to 0.1. Curves display the mean of 3 biological replicates.



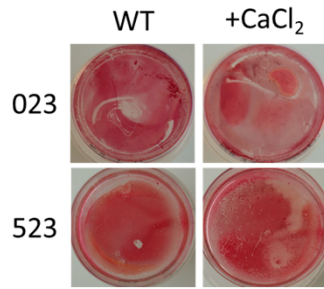

**Figure S4:** Calcium (20 mM) does not impair biofilm formation of selected *S. xylosus* strains (incubated in TSB<sup>+</sup>, 24hrs, 37 °C, stained with safranin-O)

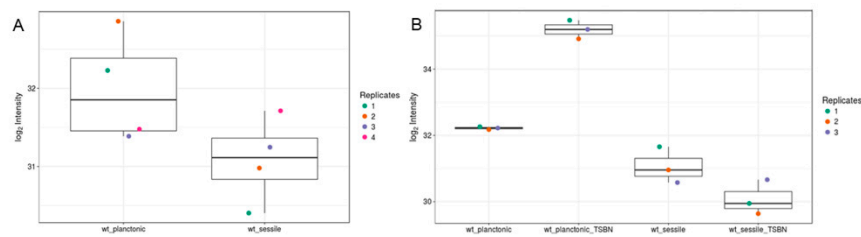

**Figure S5:** Boxplot of log<sub>2</sub> transformed LFQ-intensities measured for Bap in TMW 2.1023 (A) under planktonic and sessile conditions in Lac<sup>+</sup>, for TMW 2.1523 (B) under planktonic and sessile conditions in Lac<sup>+</sup> and TSB<sub>N</sub>.

TMW 2.1023

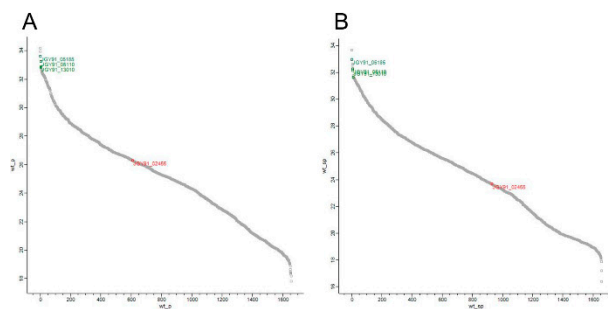

TMW 2.1523

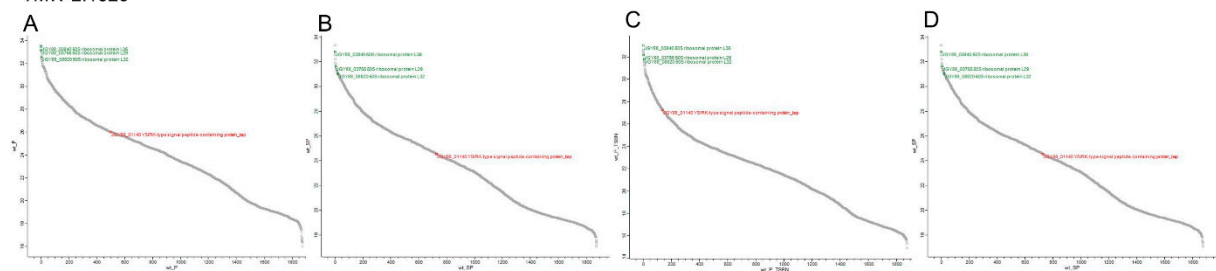

**Figure S6:** iBAQ-intensities of proteins expressed in TMW 2.1023 under planktonic (A) or sessile (B) conditions and TMW 2.1523 under planktonic Lac<sup>+</sup> (A), sessile Lac<sup>+</sup> (B), planktonic TSB<sub>N</sub> (C) and sessile TSB<sub>N</sub> (D) conditions. Bap is marked in red, highly abundant ribosomal proteins (50S) are marked in green for comparison.
